# Supplementary material for: Molecular Basis for the Evolved Instability of a Human G-Protein Coupled Receptor
Source: bioRxiv or medRxiv preprint supplement (doi:10.1101/2019.12.20.884718), 2020-05-02
Supplement: Supplementary file [file media-1.pdf]

*Supplemental Materials for:*

## **Molecular Basis for the Evolved Instability of a Human G-Protein Coupled Receptor**

Laura M. Chamness,<sup>1</sup> Nathan B. Zelt,<sup>1</sup> Charles P. Kuntz,<sup>1</sup> Brian J. Bender,<sup>3</sup> Wesley D. Penn,<sup>1</sup> Joshua J. Ziarek,<sup>2</sup> Jens Meiler,<sup>3,4</sup> and Jonathan P. Schleich<sup>1\*</sup>

<sup>1</sup>*Department of Chemistry, Indiana University, Bloomington, Indiana, USA*

<sup>2</sup>*Department of Molecular and Cellular Biochemistry, Indiana University, Bloomington, Indiana, USA*

<sup>3</sup>*Department of Chemistry, Vanderbilt University, Nashville, TN, USA*

<sup>4</sup>*Institut for Drug Development, Leipzig University, Leipzig, SAC, Germany*

This document includes:

-Figure S1

-Table S1

-Table S2

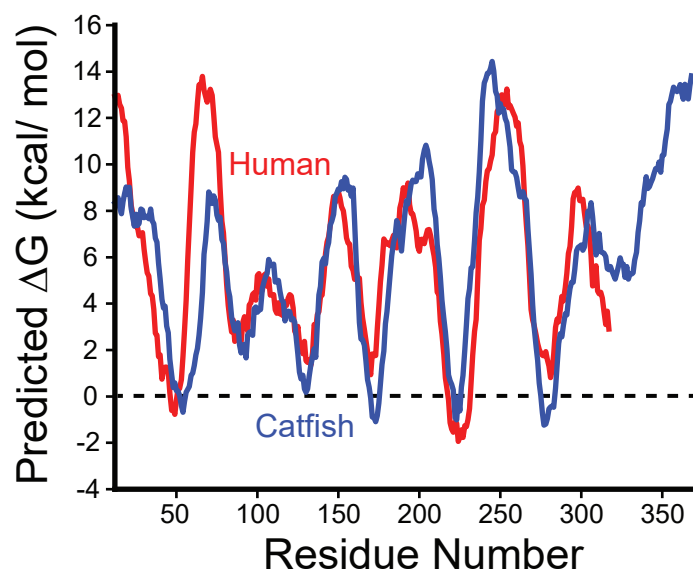

**Figure S1. Topological energetics of human and catfish GnRHRs.** Sequence-based predictions of the topological energetics of human GnRHR (red) are analyzed in relation to those of catfish GnRHR (blue). The predicted transfer free energy from the translocon to the ER membrane was predicted for each possible 23-residue segment within each protein were calculated using the  $\Delta G$  predictor, and each predicted value was plotted as a function of the central residue of the segment. A  $\Delta G$  value of 0 kcal/mol, at which membrane integration is energetically neutral, is indicated with a dashed line.

**Table S1. Predicted transfer free energies associated with the putative TM domains within GnRHRs.**

| Species                               | Accession ID   | Predicted Transfer Free Energy (kcal/mol) |        |        |        |        |        |        |              |
|---------------------------------------|----------------|-------------------------------------------|--------|--------|--------|--------|--------|--------|--------------|
|                                       |                | TM1                                       | TM2    | TM3    | TM4    | TM5    | TM6    | TM7    | 7 TM Average |
| <i>Sebastes schlegelii</i>            | AFR51715.1     | -0.291                                    | 0.825  | 0.906  | 1.105  | -2.699 | -0.554 | 0.876  | 0.024        |
| <i>Octopus vulgaris</i>               | Q2V2K5.1       | -0.028                                    | 1.189  | 1.424  | 0.542  | -2.913 | -1.049 | 2.172  | 0.191        |
| <i>Xenopus tropicalis</i>             | NP_001107549.1 | -0.637                                    | -0.343 | 1.274  | 0.538  | -3.978 | -1.698 | 1.694  | -0.450       |
| <i>Callorhinchus milii</i>            | NP_001279833.1 | -1.615                                    | 2.202  | 1.382  | -1.329 | -2.228 | -0.411 | 3.168  | 0.167        |
| <i>Dicentrarchus labrax</i>           | CAD11992.1     | -0.816                                    | 0.825  | 0.906  | 0.663  | -2.699 | -0.323 | 1.166  | -0.040       |
| <i>Danio rerio</i>                    | XP_021323652.1 | -0.621                                    | 1.556  | -0.264 | -0.995 | -1.031 | -1.108 | 4.667  | 0.315        |
| <i>Macrobrachium nipponense</i>       | AHB33640.1     | 0.957                                     | 0.78   | 2.604  | -0.513 | 0.652  | -2.433 | -2.182 | -0.019       |
| <i>Acanthopagrus schlegelii</i>       | AAV71128.1     | -0.481                                    | 0.825  | 0.906  | 0.895  | -3.319 | -0.554 | 1.166  | -0.080       |
| <i>Branchiostoma floridae</i>         | ACC68665.1     | -0.883                                    | 0.546  | -1.065 | 2.711  | -3.374 | -0.159 | 3.467  | 0.178        |
| <i>Odontesthes bonariensis</i>        | ABI75337.1     | -1.482                                    | 1.45   | -0.229 | -1.171 | -0.825 | -1.1   | 4.821  | 0.209        |
| <i>Kryptolebias marmoratus</i>        | ABK88281.1     | -0.311                                    | 0.826  | -0.1   | 0.505  | -2.422 | -1.499 | 1.021  | -0.283       |
| <i>Python bivittatus</i>              | XP_007437330.1 | 1.195                                     | 0.044  | 0.089  | 0.121  | -3.593 | -0.133 | 1.454  | -0.118       |
| <i>Monopterus albus</i>               | ARS88253.1     | -1.077                                    | 0.825  | 0.906  | 1.418  | -2.699 | -1.39  | 2.867  | 0.121        |
| <i>Cairina moschata</i>               | AGO01050.1     | 0.032                                     | 1.003  | -0.425 | -0.177 | -3.323 | -0.72  | 1.337  | -0.325       |
| <i>Gallus gallus</i>                  | AID62089.1     | 0.01                                      | 0.897  | -0.425 | 0.082  | -2.922 | -0.634 | 1.785  | -0.172       |
| <i>Ovis aries</i>                     | NP_001009397.1 | -0.854                                    | 2.352  | 1.334  | 0.677  | -2.053 | 0.805  | 3.015  | 0.754        |
| <i>Bos Taurus</i>                     | NP_803480.1    | -0.854                                    | 2.165  | 1.334  | 0.677  | -1.754 | 0.805  | 2.566  | 0.706        |
| <i>Canis lupus familiaris</i>         | NP_001003121.1 | -1.053                                    | 2.352  | 1.334  | 0.305  | -1.523 | 0.805  | 2.419  | 0.663        |
| <i>Bos mutus grunniens</i>            | Q19PY9.1       | -0.854                                    | 2.165  | 1.334  | 0.677  | -1.754 | 0.805  | 2.117  | 0.641        |
| <i>Sus scrofa</i>                     | NP_999438.1    | -0.646                                    | 2.352  | 1.334  | 0.341  | -1.949 | -0.748 | 2.566  | 0.464        |
| <i>Cavia porcellus</i>                | NP_001166428.1 | -0.363                                    | 2.352  | 1.643  | 2.21   | -2.785 | -0.163 | 2.566  | 0.780        |
| <i>Trichosurus vulpecula</i>          | Q9TTI8.1       | -0.267                                    | 2.456  | 0.655  | -0.773 | -1.129 | -0.159 | 2.87   | 0.522        |
| <i>Delphinapterus leucas</i>          | XP_022417405.1 | -0.38                                     | 2.352  | 1.179  | 0.306  | -2.389 | 0.805  | 2.566  | 0.634        |
| <i>Ictidomys tridecemlineatus</i>     | XP_005331769.1 | -0.188                                    | 2.352  | 1.334  | 0.942  | -2.053 | 0.046  | 2.566  | 0.714        |
| <i>Neomonachus schauinslandi</i>      | XP_021558093.1 | -0.38                                     | 2.497  | 1.334  | 0.305  | -1.624 | 0.563  | 2.419  | 0.731        |
| <i>Phascolarctos cinereus</i>         | XP_020855496.1 | -0.267                                    | 2.456  | 0.655  | -0.134 | -1.784 | 0.08   | 3.176  | 0.597        |
| <i>Odocoileus virginianus texanus</i> | XP_020769734.1 | -0.854                                    | 2.352  | 1.334  | 0.677  | -1.754 | 0.805  | 2.566  | 0.732        |
| <i>Bubalus bubalis</i>                | ARJ58634.1     | -0.854                                    | 2.165  | 1.334  | 0.677  | -1.754 | 0.805  | 2.566  | 0.706        |
| <i>Capra hircus</i>                   | NP_001272541.1 | -0.854                                    | 2.352  | 1.334  | 0.677  | -2.053 | 0.805  | 2.566  | 0.690        |
| <i>Equus caballus</i>                 | NP_001075305.1 | -0.38                                     | 2.352  | 1.334  | 0.535  | -1.884 | 0.805  | 2.419  | 0.740        |
| <i>Felis catus</i>                    | AFP97799.1     | -0.38                                     | 2.316  | 1.334  | 0.389  | -2.053 | 0.805  | 2.419  | 0.690        |
| <i>Sarcophilus harrisi</i>            | XP_003773267.1 | -0.477                                    | 2.475  | 0.655  | 0.101  | -1.947 | 0.08   | 2.87   | 0.537        |
| <i>Loxodonta africana</i>             | XP_003415950.1 | -0.767                                    | 2.165  | 1.832  | 0.764  | -1.744 | 0.805  | 2.566  | 0.803        |
| <i>Dasyurus novemcinctus</i>          | XP_004466930.1 | -0.249                                    | 2.165  | 1.334  | 0.787  | -1.901 | 0.303  | 2.566  | 0.715        |
| <i>Pteropus vampyrus</i>              | XP_011358956.1 | -0.293                                    | 2.352  | 1.334  | 0.773  | -1.481 | 0.805  | 2.566  | 0.865        |
| <i>Myotis lucifugus</i>               | XP_006095704.1 | -0.636                                    | 2.352  | 1.334  | 0.639  | -1.837 | 0.805  | 2.566  | 0.746        |
| <i>Physeter catodon</i>               | XP_007108070.1 | -0.38                                     | 2.352  | 1.179  | 0.306  | -2.504 | 0.805  | 2.566  | 0.618        |
| <i>Desmodus rotundus</i>              | XP_024433366.1 | -0.72                                     | 2.352  | 1.643  | 0.251  | -1.837 | 0.563  | 2.566  | 0.688        |
| <i>Neophocaena asiaorientalis</i>     | XP_024603511.1 | -0.38                                     | 2.352  | 1.179  | 0.306  | -2.389 | 0.805  | 2.566  | 0.634        |
| <i>Pteropus alecto</i>                | XP_006916576.1 | -0.38                                     | 2.352  | 1.334  | 0.773  | -1.481 | 0.805  | 2.566  | 0.853        |
| <i>Canis lupus dingo</i>              | XP_025291626.1 | -1.053                                    | 2.352  | 1.334  | 0.305  | -1.523 | 0.805  | 2.419  | 0.663        |
| <i>Oryctolagus cuniculus</i>          | AAV48838.1     | -0.091                                    | 2.352  | 1.334  | 0.431  | -2.102 | 0.046  | 2.566  | 0.648        |
| <i>Rattus norvegicus</i>              | NP_112300.2    | -0.361                                    | 2.352  | 1.461  | -0.262 | -2.053 | 0.037  | 2.566  | 0.534        |
| <i>Mus musculus</i>                   | Q01776.1       | -0.646                                    | 2.352  | 1.334  | -0.262 | -2.18  | 0.26   | 2.566  | 0.489        |
| <i>Heterocephalus glaber</i>          | XP_004849709.1 | -0.401                                    | 2.352  | 1.03   | 1.501  | -2.053 | 0.046  | 2.566  | 0.720        |
| <i>Mus caroli</i>                     | XP_021019370.1 | -0.646                                    | 2.352  | 1.334  | -0.262 | -2.18  | 0.26   | 2.566  | 0.489        |
| <i>Mus pahari</i>                     | XP_021066838.1 | -0.646                                    | 2.352  | 1.334  | -0.29  | -2.18  | 0.26   | 2.566  | 0.485        |
| <i>Papio anubis</i>                   | XP_003898885.1 | -0.774                                    | 2.165  | 1.334  | 0.934  | -2.053 | 0.805  | 2.566  | 0.711        |
| <i>Carlito syrichta</i>               | XP_008069339.1 | -1.126                                    | 2.352  | 2.049  | 0.378  | -2.053 | 0.805  | 2.419  | 0.689        |
| <i>Aotus nancymaae</i>                | XP_012328857.1 | -0.38                                     | 2.165  | 0.655  | 0.934  | -2.053 | 0.805  | 2.566  | 0.670        |
| <i>Microcebus murinus</i>             | XP_012616420.1 | -0.453                                    | 2.352  | 1.334  | 0.764  | -2.376 | 0.805  | 2.566  | 0.713        |
| <i>Theropithecus gelada</i>           | XP_025242022.1 | -0.845                                    | 2.165  | 1.239  | 0.934  | -2.053 | 0.805  | 2.566  | 0.687        |
| <i>Pan paniscus</i>                   | XP_003815858.1 | -0.774                                    | 2.165  | 1.334  | 0.934  | -1.943 | 0.805  | 2.566  | 0.727        |
| <i>Macaca nemestrina</i>              | XP_011709114.1 | -0.884                                    | 2.165  | 1.334  | 0.934  | -2.053 | 0.805  | 2.566  | 0.695        |
| <i>Pan troglodytes</i>                | XP_526608.1    | -0.774                                    | 2.165  | 1.334  | 0.934  | -1.943 | 0.805  | 2.566  | 0.727        |
| <i>Pongo abelii</i>                   | XP_024101999.1 | -0.774                                    | 2.165  | 1.334  | 0.934  | -2.053 | 0.805  | 2.566  | 0.711        |
| <i>Ptilocolobus tephrosceles</i>      | XP_023087932.1 | -0.774                                    | 2.165  | 1.334  | 0.934  | -2.053 | 0.805  | 2.566  | 0.711        |
| <i>Otolemur garnettii</i>             | XP_003801017.1 | -0.38                                     | 2.336  | 2.105  | 0.856  | -2.247 | 0.673  | 2.566  | 0.844        |
| <i>Homo sapiens</i>                   | AAB26287.1     | -0.774                                    | 2.165  | 1.334  | 0.934  | -1.943 | 0.805  | 2.566  | 0.727        |

**Table S2. Predicted versus measured apparent transfer free energies associated with TMs 2 & 6.**

| <b>TM Segment</b> | <b>Predicted <math>\Delta G_{app}</math> (kcal/ mol)†</b> | <b>Measured <math>\Delta G_{app}</math> (kcal/ mol)‡</b> |
|-------------------|-----------------------------------------------------------|----------------------------------------------------------|
| Non-mammalian TM2 | 0.73                                                      | $0.15 \pm 0.08$                                          |
| Mammalian TM2     | 2.42                                                      | $0.85 \pm 0.1$                                           |
| Non-mammalian TM6 | -0.26                                                     | $-1.38 \pm 0.01$                                         |
| Mammalian TM6     | 0.81                                                      | $0.23 \pm 0.05$                                          |

†Values were predicted from sequence using the  $\Delta G$  Predictor.

‡Values reflect the average from three independent experimental replicates, and errors reflect the standard deviation.
